# Supplementary material for: Acute and chronic effects of a light-activated FGF receptor in keratinocytes in vitro and in mice
Source: Life Sci Alliance. 2021 Sep 21;4(11):e202101100. doi: 10.26508/lsa.202101100 (PMC8473723; doi:10.26508/lsa.202101100)
Supplement: Supplementary file 2 [file LSA-2021-01100_SdataF1.2.xlsx]

## Sheet: Sheet1
		dark	light	FGF7	FGF10	10% FBS
	Experiment A11C	93.2155	83.6029	92.1216	102.975	9.03303
		92.1654	90.439	78.3649	97.8917	29.3663		Statistics	Mann Whitney test
		93.3629	83.1976	92.5662	120.605	27.7309
		97.2218	87.5461	92.1434	99.3866	8.38304		Column A	dark
		95.5715	84.5998	88.3199	98.9587	0.436142		vs.	vs.
		104.148	85.3552	98.7533	96.7415	11.0322		Column B	light
		101.34	79.4762	94.1389	93.8693	10.3346
		98.5299	86.1632	96.6279	97.0942	16.1968		Mann Whitney test
		103.135	86.6254	120.724	101.678	14.1217		P value	<0.0001
	Experiment SI12	104.765	79.4899			36.6738		Exact or approximate P value?	Exact
		92.8582	76.5289			26.3717		P value summary	****
		95.5294	75.6662			32.8436		Significantly different (P < 0.05)?	Yes
		95.1757	68.7945			32.9106		One- or two-tailed P value?	Two-tailed
		93.7409	60.8098			30.4332		Sum of ranks in column A,B	2885 , 1120
		93.7893	60.9979			32.0775		Mann-Whitney U	130
		94.5608	76.7084			25.1425
		87.3167	67.9047			25.9946		Difference between medians
		91.7125	70.8961			19.7429		Median of column A	98.35, n=45
		104.361	44.8658			23.3937		Median of column B	82.25, n=44
		93.7953	63.8957			21.7331		Difference: Actual	16.1
		110.285	63.2847			15.8376		Difference: Hodges-Lehmann	18.45
		97.3703	79.0993			29.051
		90.9071	66.3478			25.5038
		89.3382	79.4625			4.86368		Column A	dark
		100.274	78.35			34.5183		vs.	vs.
		103.892	72.6354			26.8276		Column C	FGF7
		88.9285	78.541			34.1783
	Experiment SI14	127.088	90.8005					Mann Whitney test
		132.281	81.3046					P value	0.0373
		128.411	85.2043					Exact or approximate P value?	Exact
		97.1157	96.0663					P value summary	*
		109.544	87.3991					Significantly different (P < 0.05)?	Yes
		113.474	76.9752					One- or two-tailed P value?	Two-tailed
		104.303	87.8123					Sum of ranks in column A,C	1327 , 158
		98.5541	84.4187					Mann-Whitney U	113
		98.3515	76.9592
		96.5911	96.5087					Difference between medians
		105.203	94.5491					Median of column A	98.35, n=45
		94.5362	89.7246					Median of column C	92.57, n=9
		99.3715	89.2757					Difference: Actual	5.785
		128.972	106.821					Difference: Hodges-Lehmann	5.469
		109.071	95.5302
		105.123
		125.056	94.7389					Column A	dark
		94.7758	83.2537					vs.	vs.
								Column D	FGF10
								Mann Whitney test
								P value	0.715
								Exact or approximate P value?	Exact
								P value summary	ns
								Significantly different (P < 0.05)?	No
								One- or two-tailed P value?	Two-tailed
								Sum of ranks in column A,D	1221 , 264
								Mann-Whitney U	186
								Difference between medians
								Median of column A	98.35, n=45
								Median of column D	98.96, n=9
								Difference: Actual	-0.6073
								Difference: Hodges-Lehmann	-0.8566
								Column A	dark
								vs.	vs.
								Column E	10% FBS
								Mann Whitney test
								P value	<0.0001
								Exact or approximate P value?	Exact
								P value summary	****
								Significantly different (P < 0.05)?	Yes
								One- or two-tailed P value?	Two-tailed
								Sum of ranks in column A,E	2250 , 378
								Mann-Whitney U	0
								Difference between medians
								Median of column A	98.35, n=45
								Median of column E	25.50, n=27
								Difference: Actual	72.85
								Difference: Hodges-Lehmann	77.06
