# Supplementary material for: Acute and chronic effects of a light-activated FGF receptor in keratinocytes in vitro and in mice
Source: Life Sci Alliance. 2021 Sep 21;4(11):e202101100. doi: 10.26508/lsa.202101100 (PMC8473723; doi:10.26508/lsa.202101100)
Supplement: Supplementary file 8 [file LSA-2021-01100_SdataF3.2.xlsx]

## Sheet: Sheet1
		first year		second year
		male	female	male	female
	total number of mice	31	39	42	54
	label of the mice with tumour	34	94	325	521
		85	91	328	605
		6	51	370
		84	160	354
		134		409
		116		413
		153		459
		155		458
		203		423
		162		517
		248		527
		249		513
		256
		235
	number of mice with tumour	14	4	12	2
		14/31	4/39	12/42	2/54
	tumour incidence	45.1613	10.2564	28.5714	3.7037
