# Supplementary material for: Acute and chronic effects of a light-activated FGF receptor in keratinocytes in vitro and in mice
Source: Life Sci Alliance. 2021 Sep 21;4(11):e202101100. doi: 10.26508/lsa.202101100 (PMC8473723; doi:10.26508/lsa.202101100)
Supplement: Supplementary file 10 [file LSA-2021-01100_SdataF5.1.xlsx]

## Sheet: Sheet1
	DUSP6	DMSO							Dox								HBEGF	DMSO							Dox								VEGF	DMSO				Dox
	dark	1.24667	2.7643	0.806981	1.1831	0.31503	0.398271	0.285638	0.927272	2.6933	1.76197	1.00205	0.345072	0.407172	0.353563		dark	0.830399	1.66332	1.16006	1.00641	0.761293	0.943366	0.635151	0.882846	2.08364	1.35152	0.974032	0.840902	0.810914	0.724142		dark	1.27867	0.929614	0.9859	0.805816	1.06463	0.90573	0.741239	0.623484
	1/15 light	0.407155	3.52463	0.692818	0.825626	0.420189	0.288766	0.28656	1.42164	1.75391	2.9901	1.54511	1.28453	0.841755	1.02159		1/15 light	0.44474	2.7885	1.08212	1.2242	1.10122	1.00101	0.771576	1.2416	1.99801	1.83986	1.08502	1.13595	0.784807	1.05185		1/15 light	1.76935	1.26552	1.02769	0.919274	1.27154	1.06946	0.667379	0.712156
	1/60 light	1.01704	2.8016	0.464883	0.685617	0.472773	0.290005	0.404296	0.79061	2.54349	1.50943	0.82929	0.380858	0.319919	0.366663		1/60 light	1.00221	2.268	0.850678	1.15233	1.1514	0.880243	0.910728	1.03036	2.44705	1.60215	1.1712	1.06235	0.772609	0.843806		1/60 light	1.76935	1.26552	1.02769	0.919274	1.12685	0.845376	0.715484	0.675639
	contin. light	1.19878	1.38817	1.56767	1.31576	0.773463	0.467649	0.564655	3.03487	8.60986	8.44624	10.5067	4.68671	3.92788	3.83402		contin. light	1.5339	2.074	1.90033	1.52195	1.81292	1.24813	1.13381	1.51361	4.44425	3.17652	3.67487	2.28232	2.32771	2.01891		contin. light	2.33889	1.35689	1.21616	1.45446	4.06096	1.73093	1.77196	1.63808
	FGF7	32.6573	24.0023	33.263	17.0699	23.0494	21.2696	11.6399	19.7091	14.4911	8.4717	12.4681					FGF7	1.74912	2.57889	1.90803	2.53201	2.82118	2.95936	1.45824	3.06967	2.44064	1.72573	2.0782					FGF7	3.95832	3.83989	3.01243	2.20479	3.20817	2.64678	1.25419	1.52793
	FGF10	25.0663	56.7218	55.1063	31.5502	22.3879	20.0638	13.3593	13.9327	10.0119	7.79673	4.70837					FGF10	1.79776	5.45003	2.62044	4.06199	2.85611	2.50711	1.62374	2.22254	1.6321	1.53094	0.966701					FGF10	4.22403	2.88148	1.64061	1.43106	2.6865	1.4429	1.10963	0.751826
	Statistics	Mann Whitney test			experiments: T87, T90, T91, T114, T116												Statistics	Mann Whitney test			experiments: T87, T90, T91, T114, T116												Statistics	Mann Whitney test			experiments: T114, T116
	Column B	1/15 +															Column B	1/15 +															Column B	1/15 +
	vs.	vs.															vs.	vs.															vs.	vs.
	Column A	dark +															Column A	dark +															Column A	dark +
	Mann Whitney test																Mann Whitney test																Mann Whitney test
	P value	0.2086															P value	0.3176															P value	0.6857
	Exact or approximate P value?	Exact															Exact or approximate P value?	Exact															Exact or approximate P value?	Exact
	P value summary	ns															P value summary	ns															P value summary	ns
	Significantly different (P < 0.05)?	No															Significantly different (P < 0.05)?	No															Significantly different (P < 0.05)?	No
	One- or two-tailed P value?	Two-tailed															One- or two-tailed P value?	Two-tailed															One- or two-tailed P value?	Two-tailed
	Sum of ranks in column A,B	42 , 63															Sum of ranks in column A,B	44 , 61															Sum of ranks in column A,B	16 , 20
	Mann-Whitney U	14															Mann-Whitney U	16															Mann-Whitney U	6
	Difference between medians																Difference between medians																Difference between medians
	Median of column A	0.8672, n=7															Median of column A	0.6613, n=7															Median of column A	0.8235, n=4
	Median of column B	1.330, n=7															Median of column B	0.8509, n=7															Median of column B	0.8908, n=4
	Difference: Actual	0.4624															Difference: Actual	0.1896															Difference: Actual	0.06732
	Difference: Hodges-Lehmann	0.5079															Difference: Hodges-Lehmann	0.1829															Difference: Hodges-Lehmann	0.06628
	Column C	1/60 +															Column C	1/60 +															Column C	1/60 +
	vs.	vs.															vs.	vs.															vs.	vs.
	Column A	dark +															Column A	dark +															Column A	dark +
	Mann Whitney test																Mann Whitney test																Mann Whitney test
	P value	0.7104															P value	0.3829															P value	>0.9999
	Exact or approximate P value?	Exact															Exact or approximate P value?	Exact															Exact or approximate P value?	Exact
	P value summary	ns															P value summary	ns															P value summary	ns
	Significantly different (P < 0.05)?	No															Significantly different (P < 0.05)?	No															Significantly different (P < 0.05)?	No
	One- or two-tailed P value?	Two-tailed															One- or two-tailed P value?	Two-tailed															One- or two-tailed P value?	Two-tailed
	Sum of ranks in column A,C	56 , 49															Sum of ranks in column A,C	45 , 60															Sum of ranks in column A,C	18 , 18
	Mann-Whitney U	21															Mann-Whitney U	17															Mann-Whitney U	8
	Difference between medians																Difference between medians																Difference between medians
	Median of column A	0.8672, n=7															Median of column A	0.6613, n=7															Median of column A	0.8235, n=4
	Median of column C	0.7394, n=7															Median of column C	0.7958, n=7															Median of column C	0.7804, n=4
	Difference: Actual	-0.1278															Difference: Actual	0.1345															Difference: Actual	-0.04305
	Difference: Hodges-Lehmann	-0.03789															Difference: Hodges-Lehmann	0.1345															Difference: Hodges-Lehmann	0.0132
	Column D	cont. +															Column D	cont. +															Column D	cont. +
	vs.	vs.															vs.	vs.															vs.	vs.
	Column A	dark +															Column A	dark +															Column A	dark +
	Mann Whitney test																Mann Whitney test																Mann Whitney test
	P value	0.0006															P value	0.0023															P value	0.0286
	Exact or approximate P value?	Exact															Exact or approximate P value?	Exact															Exact or approximate P value?	Exact
	P value summary	***															P value summary	**															P value summary	*
	Significantly different (P < 0.05)?	Yes															Significantly different (P < 0.05)?	Yes															Significantly different (P < 0.05)?	Yes
	One- or two-tailed P value?	Two-tailed															One- or two-tailed P value?	Two-tailed															One- or two-tailed P value?	Two-tailed
	Sum of ranks in column A,D	28 , 77															Sum of ranks in column A,D	30 , 75															Sum of ranks in column A,D	10 , 26
	Mann-Whitney U	0															Mann-Whitney U	2															Mann-Whitney U	0
	Difference between medians																Difference between medians																Difference between medians
	Median of column A	0.8672, n=7															Median of column A	0.6613, n=7															Median of column A	0.8235, n=4
	Median of column D	4.383, n=7															Median of column D	1.744, n=7															Median of column D	1.751, n=4
	Difference: Actual	3.516															Difference: Actual	1.082															Difference: Actual	0.928
	Difference: Hodges-Lehmann	3.516															Difference: Hodges-Lehmann	1.102															Difference: Hodges-Lehmann	1.002
	Column E	FGF7 +															Column E	FGF7 +															Column E	FGF7 +
	vs.	vs.															vs.	vs.															vs.	vs.
	Column A	dark +															Column A	dark +															Column A	dark +
	Mann Whitney test																Mann Whitney test																Mann Whitney test
	P value	0.0061															P value	0.0242															P value	0.0286
	Exact or approximate P value?	Exact															Exact or approximate P value?	Exact															Exact or approximate P value?	Exact
	P value summary	**															P value summary	*															P value summary	*
	Significantly different (P < 0.05)?	Yes															Significantly different (P < 0.05)?	Yes															Significantly different (P < 0.05)?	Yes
	One- or two-tailed P value?	Two-tailed															One- or two-tailed P value?	Two-tailed															One- or two-tailed P value?	Two-tailed
	Sum of ranks in column A,E	28 , 38															Sum of ranks in column A,E	30 , 36															Sum of ranks in column A,E	10 , 26
	Mann-Whitney U	0															Mann-Whitney U	2															Mann-Whitney U	0
	Difference between medians																Difference between medians																Difference between medians
	Median of column A	0.8672, n=7															Median of column A	0.6613, n=7															Median of column A	0.8235, n=4
	Median of column E	12.61, n=4															Median of column E	1.693, n=4															Median of column E	2.087, n=4
	Difference: Actual	11.74															Difference: Actual	1.031															Difference: Actual	1.264
	Difference: Hodges-Lehmann	11.33															Difference: Hodges-Lehmann	0.9112															Difference: Hodges-Lehmann	1.243
	Column F	FGF10 +															Column F	FGF10 +															Column F	FGF10 +
	vs.	vs.															vs.	vs.															vs.	vs.
	Column A	dark +															Column A	dark +															Column A	dark +
	Mann Whitney test																Mann Whitney test																Mann Whitney test
	P value	0.0061															P value	0.1091															P value	0.1143
	Exact or approximate P value?	Exact															Exact or approximate P value?	Exact															Exact or approximate P value?	Exact
	P value summary	**															P value summary	ns															P value summary	ns
	Significantly different (P < 0.05)?	Yes															Significantly different (P < 0.05)?	No															Significantly different (P < 0.05)?	No
	One- or two-tailed P value?	Two-tailed															One- or two-tailed P value?	Two-tailed															One- or two-tailed P value?	Two-tailed
	Sum of ranks in column A,F	28 , 38															Sum of ranks in column A,F	33 , 33															Sum of ranks in column A,F	12 , 24
	Mann-Whitney U	0															Mann-Whitney U	5															Mann-Whitney U	2
	Difference between medians																Difference between medians																Difference between medians
	Median of column A	0.8672, n=7															Median of column A	0.6613, n=7															Median of column A	0.8235, n=4
	Median of column F	8.328, n=4															Median of column F	1.185, n=4															Median of column F	1.276, n=4
	Difference: Actual	7.46															Difference: Actual	0.5234															Difference: Actual	0.4528
	Difference: Hodges-Lehmann	6.965															Difference: Hodges-Lehmann	0.4892															Difference: Hodges-Lehmann	0.4322
				not included in the figure:																not included in the figure:																not included in the figure:
	Column H	FGF7 -		Column H	FGF7 -												Column H	FGF7 -		Column H	FGF7 -												Column H	FGF7 -		Column H	FGF7 -
	vs.	vs.		vs.	vs.												vs.	vs.		vs.	vs.												vs.	vs.		vs.	vs.
	Column A	dark +		Column G	dark -												Column A	dark +		Column G	dark -												Column A	dark +		Column G	dark -
	Mann Whitney test			Mann Whitney test													Mann Whitney test			Mann Whitney test													Mann Whitney test			Mann Whitney test
	P value	0.0006		P value	0.0006												P value	0.0041		P value	0.0012												P value	0.0286		P value	0.0286
	Exact or approximate P value?	Exact		Exact or approximate P value?	Exact												Exact or approximate P value?	Exact		Exact or approximate P value?	Exact												Exact or approximate P value?	Exact		Exact or approximate P value?	Exact
	P value summary	***		P value summary	***												P value summary	**		P value summary	**												P value summary	*		P value summary	*
	Significantly different (P < 0.05)?	Yes		Significantly different (P < 0.05)?	Yes												Significantly different (P < 0.05)?	Yes		Significantly different (P < 0.05)?	Yes												Significantly different (P < 0.05)?	Yes		Significantly different (P < 0.05)?	Yes
	One- or two-tailed P value?	Two-tailed		One- or two-tailed P value?	Two-tailed												One- or two-tailed P value?	Two-tailed		One- or two-tailed P value?	Two-tailed												One- or two-tailed P value?	Two-tailed		One- or two-tailed P value?	Two-tailed
	Sum of ranks in column A,H	28 , 77		Sum of ranks in column G,H	28 , 77												Sum of ranks in column A,H	31 , 74		Sum of ranks in column G,H	29 , 76												Sum of ranks in column A,H	10 , 26		Sum of ranks in column G,H	10 , 26
	Mann-Whitney U	0		Mann-Whitney U	0												Mann-Whitney U	3		Mann-Whitney U	1												Mann-Whitney U	0		Mann-Whitney U	0
	Difference between medians			Difference between medians													Difference between medians			Difference between medians													Difference between medians			Difference between medians
	Median of column A	0.8672, n=7		Median of column G	0.7547, n=7												Median of column A	0.6613, n=7		Median of column G	0.7067, n=7												Median of column A	0.8235, n=4		Median of column G	0.9578, n=4
	Median of column H	21.56, n=7		Median of column H	21.56, n=7												Median of column H	1.897, n=7		Median of column H	1.897, n=7												Median of column H	3.426, n=4		Median of column H	3.426, n=4
	Difference: Actual	20.69		Difference: Actual	20.8												Difference: Actual	1.235		Difference: Actual	1.19												Difference: Actual	2.603		Difference: Actual	2.468
	Difference: Hodges-Lehmann	20.62		Difference: Hodges-Lehmann	20.45												Difference: Hodges-Lehmann	0.8843		Difference: Hodges-Lehmann	0.9709												Difference: Hodges-Lehmann	2.582		Difference: Hodges-Lehmann	2.384
	Column I	FGF10 -		Column I	FGF10 -												Column I	FGF10 -		Column I	FGF10 -												Column I	FGF10 -		Column I	FGF10 -
	vs.	vs.		vs.	vs.												vs.	vs.		vs.	vs.												vs.	vs.		vs.	vs.
	Column A	dark +		Column G	dark -												Column A	dark +		Column G	dark -												Column A	dark +		Column G	dark -
	Mann Whitney test			Mann Whitney test													Mann Whitney test			Mann Whitney test													Mann Whitney test			Mann Whitney test
	P value	0.0006		P value	0.0006												P value	0.0023		P value	0.0012												P value	0.0286		P value	0.0286
	Exact or approximate P value?	Exact		Exact or approximate P value?	Exact												Exact or approximate P value?	Exact		Exact or approximate P value?	Exact												Exact or approximate P value?	Exact		Exact or approximate P value?	Exact
	P value summary	***		P value summary	***												P value summary	**		P value summary	**												P value summary	*		P value summary	*
	Significantly different (P < 0.05)?	Yes		Significantly different (P < 0.05)?	Yes												Significantly different (P < 0.05)?	Yes		Significantly different (P < 0.05)?	Yes												Significantly different (P < 0.05)?	Yes		Significantly different (P < 0.05)?	Yes
	One- or two-tailed P value?	Two-tailed		One- or two-tailed P value?	Two-tailed												One- or two-tailed P value?	Two-tailed		One- or two-tailed P value?	Two-tailed												One- or two-tailed P value?	Two-tailed		One- or two-tailed P value?	Two-tailed
	Sum of ranks in column A,I	28 , 77		Sum of ranks in column G,I	28 , 77												Sum of ranks in column A,I	30 , 75		Sum of ranks in column G,I	29 , 76												Sum of ranks in column A,I	10 , 26		Sum of ranks in column G,I	10 , 26
	Mann-Whitney U	0		Mann-Whitney U	0												Mann-Whitney U	2		Mann-Whitney U	1												Mann-Whitney U	0		Mann-Whitney U	0
	Difference between medians			Difference between medians													Difference between medians			Difference between medians													Difference between medians			Difference between medians
	Median of column A	0.8672, n=7		Median of column G	0.7547, n=7												Median of column A	0.6613, n=7		Median of column G	0.7067, n=7												Median of column A	0.8235, n=4		Median of column G	0.9578, n=4
	Median of column I	23.44, n=7		Median of column I	23.44, n=7												Median of column I	1.963, n=7		Median of column I	1.963, n=7												Median of column I	2.261, n=4		Median of column I	2.261, n=4
	Difference: Actual	22.58		Difference: Actual	22.69												Difference: Actual	1.302		Difference: Actual	1.256												Difference: Actual	1.438		Difference: Actual	1.303
	Difference: Hodges-Lehmann	22.58		Difference: Hodges-Lehmann	22.69												Difference: Hodges-Lehmann	1.271		Difference: Hodges-Lehmann	1.271												Difference: Hodges-Lehmann	1.417		Difference: Hodges-Lehmann	1.219
	Column J	cont -															Column J	cont -
	vs.	vs.															vs.	vs.
	Column D	cont. +															Column D	cont. +
	Mann Whitney test																Mann Whitney test
	P value	0.0006															P value	0.0175
	Exact or approximate P value?	Exact															Exact or approximate P value?	Exact
	P value summary	***															P value summary	*
	Significantly different (P < 0.05)?	Yes															Significantly different (P < 0.05)?	Yes
	One- or two-tailed P value?	Two-tailed															One- or two-tailed P value?	Two-tailed
	Sum of ranks in column D,J	77 , 28															Sum of ranks in column D,J	71 , 34
	Mann-Whitney U	0															Mann-Whitney U	6
	Difference between medians																Difference between medians
	Median of column D	4.383, n=7															Median of column D	1.744, n=7
	Median of column J	1.117, n=7															Median of column J	1.149, n=7
	Difference: Actual	-3.267															Difference: Actual	-0.5946
	Difference: Hodges-Lehmann	-3.267															Difference: Hodges-Lehmann	-0.7747
